# Supplementary material for: Exposure Assessment of Cadmium in Female Farmers in Cadmium-Polluted Areas in Northern Japan
Source: MDPI journal article supplement (doi:10.3390/toxics8020044), 2020-06-17
Supplement: s1 [file s1]

# Supplementary Materials: Exposure Assessment of Cadmium in Female Farmers in Cadmium-Polluted Areas in Northern Japan

Hyogo Horiguchi, Etsuko Oguma, Satoshi Sasaki, Kayoko Miyamoto, Yoko Hosoi, Akira Ono, and Fujio Kayama

**Table S1.** Annual trend of rates of rice with a cadmium concentration above the safety standard (0.4 mg/kg) in the intensive inspections targeted for 3 cadmium-polluted areas in Akita prefecture, Japan, around the start of the flooding of paddy fields (2002). These inspections were prosecuted based on the Anti-Farm Soil Pollution Law of Japan, and the results are open to the public (Akita Prefect. Dep. of Agriculture, Forestry and Fisheries). Data are presented as percentages of rice with a cadmium concentration above the safety standard along with (numbers of rice with a cadmium concentration above the safety standard/total numbers of inspected rice).

| Areas  | 2000             | 2001             | 2002            | 2003            | 2004           |
|--------|------------------|------------------|-----------------|-----------------|----------------|
| Odate  | 25.0%<br>(3/12)  | 13.5%<br>(5/37)  | 14.3%<br>(3/21) | 13.3%<br>(2/15) | 0%<br>(0/8)    |
| Kazuno | 37.5%<br>(12/32) | 39.7%<br>(27/68) | 11.8%<br>(8/68) | 3.1%<br>(2/65)  | 1.4%<br>(1/71) |
| Kosaka | 38.5%<br>(5/13)  | 37.5%<br>(6/16)  | 12.5%<br>(2/16) | 0%<br>(0/17)    | 0%<br>(0/24)   |
